# Supplementary material for: Customized Deep Eutectic Solvents as Green Extractants for Ultrasonic-Assisted Enhanced Extraction of Phenolic Antioxidants from Dogbane Leaf-Tea
Source: MDPI journal article supplement (doi:10.3390/foods10112527), 2021-10-21
Supplement: s1 [file s1]

**Table S2**

Independent process variables with experimental ranges and levels of response surface methodology.

| Independent Variable                            | Code                |    |    |    |                     |
|-------------------------------------------------|---------------------|----|----|----|---------------------|
|                                                 | -1.68 ( $-\alpha$ ) | -1 | 0  | +1 | +1.68 ( $+\alpha$ ) |
| X <sub>1</sub> : Water content (WC, %)          | 4.77                | 15 | 30 | 45 | 55.23               |
| X <sub>2</sub> : Ultrasonic time (t, min)       | 3.18                | 10 | 20 | 30 | 36.82               |
| X <sub>3</sub> : Ultrasonic temperature (T, °C) | 23.18               | 30 | 40 | 50 | 56.82               |
