# Supplementary material for: Customized Deep Eutectic Solvents as Green Extractants for Ultrasonic-Assisted Enhanced Extraction of Phenolic Antioxidants from Dogbane Leaf-Tea
Source: MDPI journal article supplement (doi:10.3390/foods10112527), 2021-10-21
Supplement: s1 [file s1]

**Table S1**

Experimental design and results of full factorial design experimental

| Run | Independent variables |               |            |              |            | Responses             |                      |
|-----|-----------------------|---------------|------------|--------------|------------|-----------------------|----------------------|
|     | A: WC (%)             | B: L/S (mL/g) | C: t (min) | D: Power (W) | E: T (°C)  | Y1: TPC (mg GAE/g DW) | Y2: TFC (mg RE/g DW) |
| 1   | 15.00 (-1)            | 10.00 (-1)    | 20.00 (+1) | 100.00 (-1)  | 35.00 (-1) | 63.86 ± 6.97          | 43.68 ± 2.25         |
| 2   | 45.00 (+1)            | 10.00 (-1)    | 5.00 (-1)  | 100.00 (-1)  | 35.00 (-1) | 66.06 ± 1.97          | 51.85 ± 4.51         |
| 3   | 15.00 (-1)            | 30.00 (+1)    | 20.00 (+1) | 100.00 (-1)  | 50.00 (+1) | 70.50 ± 5.64          | 55.62 ± 5.92         |
| 4   | 15.00 (-1)            | 10.00 (-1)    | 5.00 (-1)  | 100.00 (-1)  | 50.00 (+1) | 73.92 ± 4.55          | 35.22 ± 2.73         |
| 5   | 45.00 (+1)            | 10.00 (-1)    | 5.00 (-1)  | 200.00 (+1)  | 50.00 (+1) | 78.14 ± 1.77          | 34.42 ± 0.31         |
| 6   | 45.00 (+1)            | 30.00 (+1)    | 5.00 (-1)  | 100.00 (-1)  | 50.00 (+1) | 73.36 ± 2.53          | 55.99 ± 3.74         |
| 7   | 45.00 (+1)            | 10.00 (-1)    | 20.00 (+1) | 200.00 (+1)  | 35.00 (-1) | 82.13 ± 1.05          | 63.88 ± 0.12         |
| 8   | 45.00 (+1)            | 30.00 (+1)    | 20.00 (+1) | 100.00 (-1)  | 35.00 (-1) | 80.14 ± 5.28          | 60.35 ± 6.23         |
| 9   | 15.00 (-1)            | 30.00 (+1)    | 5.00 (-1)  | 200.00 (+1)  | 50.00 (+1) | 67.46 ± 3.79          | 35.09 ± 2.83         |
| 10  | 15.00 (-1)            | 30.00 (+1)    | 20.00 (+1) | 200.00 (+1)  | 35.00 (-1) | 63.36 ± 3.76          | 45.42 ± 6.91         |
| 11  | 15.00 (-1)            | 10.00 (-1)    | 20.00 (+1) | 200.00 (+1)  | 50.00 (+1) | 78.86 ± 5.97          | 48.80 ± 4.88         |
| 12  | 15.00 (-1)            | 10.00 (-1)    | 5.00 (-1)  | 200.00 (+1)  | 35.00 (-1) | 55.58 ± 5.21          | 32.68 ± 1.02         |
| 13  | 45.00 (+1)            | 10.00 (-1)    | 20.00 (+1) | 100.00 (-1)  | 50.00 (+1) | 82.55 ± 4.49          | 66.27 ± 3.21         |
| 14  | 45.00 (+1)            | 30.00 (+1)    | 5.00 (-1)  | 200.00 (+1)  | 35.00 (-1) | 78.56 ± 5.11          | 55.62 ± 1.24         |
| 15  | 45.00 (+1)            | 30.00 (+1)    | 20.00 (+1) | 200.00 (+1)  | 50.00 (+1) | 84.79 ± 0.51          | 84.62 ± 2.77         |
| 16  | 15.00 (-1)            | 30.00 (+1)    | 5.00 (-1)  | 100.00 (-1)  | 35.00 (-1) | 56.75 ± 3.44          | 41.35 ± 4.02         |
