# Supplementary figures and images for: Customized Deep Eutectic Solvents as Green Extractants for Ultrasonic-Assisted Enhanced Extraction of Phenolic Antioxidants from Dogbane Leaf-Tea
Source: MDPI journal article supplement (doi:10.3390/foods10112527), 2021-10-21

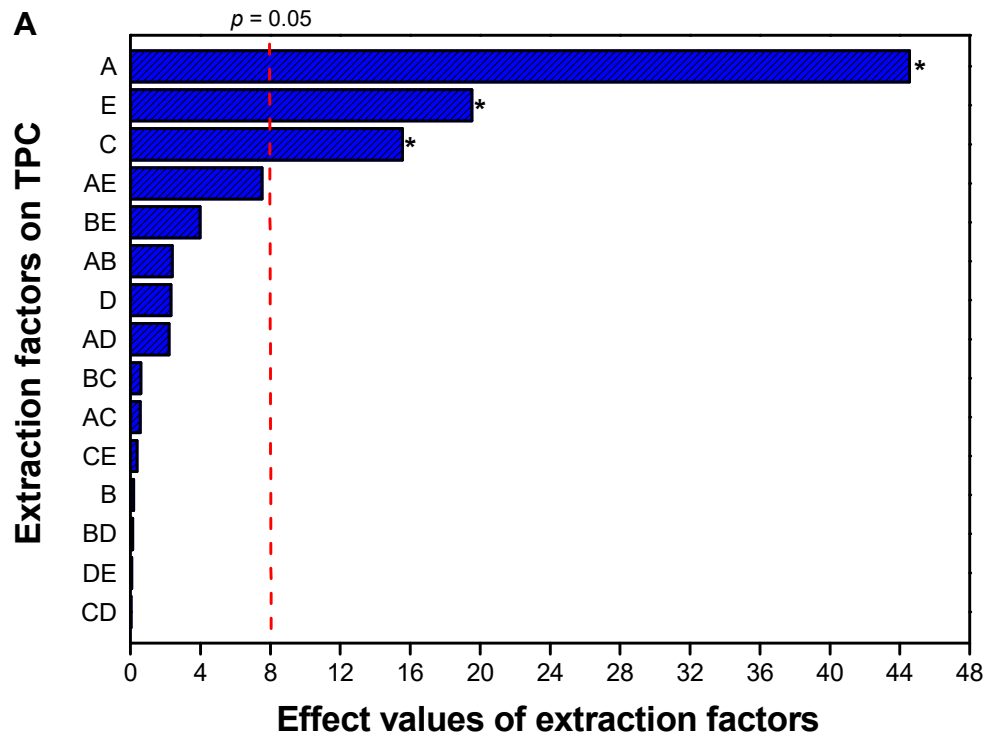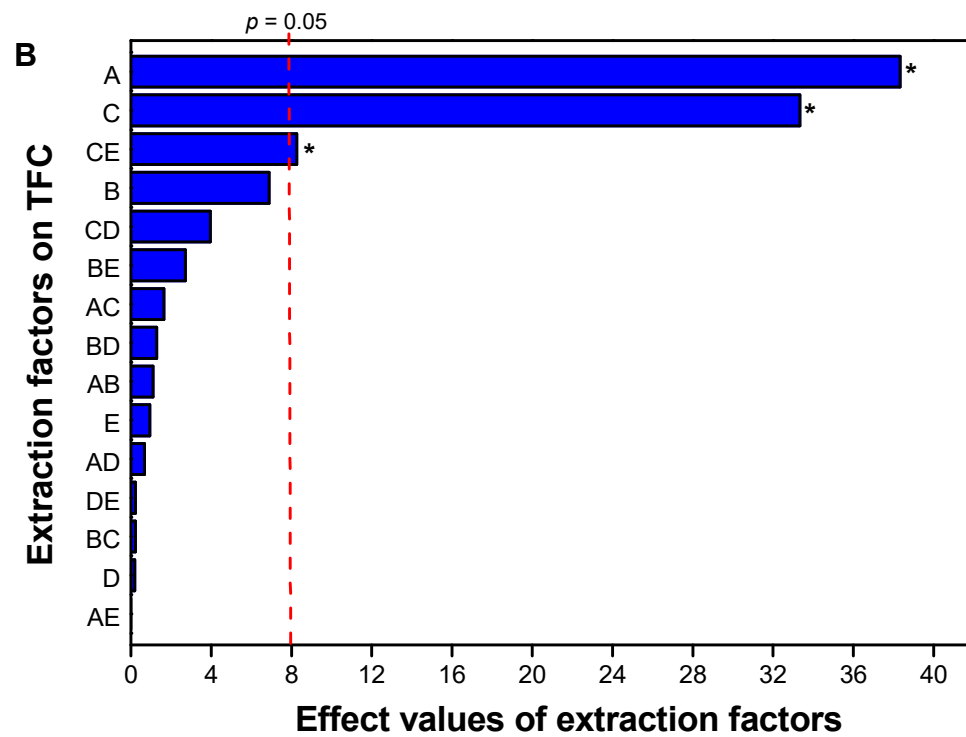

Supplement: s1 [file s1]
